1 **Mining ancient microbiomes using selective enrichment of damaged DNA**  
2 **molecules**

3 Clemens L. Weiß<sup>a</sup>, Marie-Theres Gansauge<sup>b</sup>, Ayinuer Aximu-Petri<sup>b</sup>, Matthias Meyer<sup>b</sup>,  
4 Hernán A. Burbano<sup>a#</sup>

5 <sup>a</sup>Research Group for Ancient Genomics and Evolution, Department of Molecular  
6 Biology, Max Planck Institute for Developmental Biology, 72076 Tübingen, Germany

7 <sup>b</sup>Department of Evolutionary Genetics, Max Planck Institute for Evolutionary  
8 Anthropology, 04103 Leipzig, Germany

9 Running Head: Uracil selection for validation of ancient metagenomes

10 #Address correspondence to Hernán A. Burbano, [hernan.burbano@tuebingen.mpg.de](mailto:hernan.burbano@tuebingen.mpg.de)

## 11 **Abstract**

12 The identification of bona fide microbial taxa in microbiomes derived from historical  
13 samples is complicated by the unavoidable mixture between DNA from ante- and  
14 post-mortem microbial colonizers. One possibility to distinguish between these sources  
15 of microbial DNA is querying for the presence of age-associated degradation patterns  
16 typical of ancient DNA (aDNA). The presence of uracils, resulting from cytosine  
17 deamination, has been detected ubiquitously in aDNA retrieved from diverse sources,  
18 and used as an authentication criterion. Here, we employ a library preparation method  
19 that separates molecules that carry uracils from those that do not for a set of samples  
20 that includes Neandertal remains, herbaria specimens and archaeological plant  
21 remains. We show that this method facilitates the discovery of authentic ancient  
22 microbial taxa, as it amplifies degradation patterns that would otherwise be difficult to  
23 detect in sequences from diverse microbial mixtures.

## 24 **Importance**

25 The utility of DNA from historical specimens is being recognized in a growing number of  
26 fields, ranging from human, animal and plant genetics, to microbiology and  
27 epidemiology of infectious diseases. Providing positive evidence for the authenticity of  
28 such ancient DNA from diverse sources is instrumental for all studies that make use of  
29 this resource. This is especially challenging when studying ancient microbes, due to  
30 their high genetic diversity and the incompleteness of reference databases. The method

31 we employ and characterize here aids this process through the selective enrichment of  
32 molecules that carry signatures of age-associated degradation.

### 33 **Introduction**

34 DNA retrieved from historical or ancient samples is a complex mixture of  
35 molecules that contains not only endogenous host DNA, but also DNA from  
36 microorganisms that were present ante-mortem or that colonized the tissue post-mortem  
37 (1). Therefore, all ancient DNA (aDNA) shotgun sequencing projects are metagenomic  
38 in nature. While earlier aDNA research has mostly focused on the evolution of animals  
39 and plants (2, 3), a growing number of studies are now centering on the identification  
40 and characterization of ancient pathogens and microbiomes (4). Ancient microbes  
41 permit the replacement of indirect inferences about the past with direct observations of  
42 microbial genomes through time. In the pathogen field, it has been possible to identify  
43 causal and/or associated agents of historical plant and animal disease outbreaks, as  
44 well as their spreading patterns throughout both space and time (e.g. (5, 6)). Another  
45 challenging endeavour is the characterization of shifts in composition of microbial  
46 communities over time. For example, dental calculus from hominids has been exploited  
47 as a source of ancient microbiomes and analyzed in the context of diet and lifestyle  
48 changes (7–9), whereas coprolites have been used to investigate ecological interactions  
49 between animals and microorganisms (10). However, this approach is at its beginnings

50 and the influence of major selective pressures on microbiome evolution remains to be  
51 explored.

52 A major challenge for the study of aDNA in general, and ancient microbiomes in  
53 particular, is the presence of contaminating exogenous DNA, which makes distinction  
54 between *bona fide* ancient microbiome sequences and those of recent origin crucial.  
55 One of the most typical features of aDNA is the presence of uracils (Us) that originate  
56 from post-mortem deamination of cytosines (Cs), especially in single-stranded  
57 overhangs at molecule ends (11). Uracils are read as thymines (Ts) by most DNA  
58 polymerases, which generates a characteristic increase in C-to-T substitutions at the  
59 end of aDNA sequences ((11), Figure 1D and 2A). The presence of such C-to-T  
60 substitutions can be used as evidence for the authenticity of DNA sequences retrieved  
61 from historical material (12–14).

62 Recently, a single-stranded library preparation method (U-selection) was  
63 developed, which allows physical separation of uracil-containing molecules from  
64 non-deaminated ones (15). In U-selection all library molecules are initially immobilized  
65 on streptavidin beads, to which molecules without uracils remain attached (U-depleted  
66 fraction), while uracil-containing molecules (originally deaminated) are released into  
67 solution (U-enriched fraction). U-selection was originally developed with the aim of  
68 increasing the amount of ancient hominid DNA (e.g. Neandertals) from a background of  
69 present-day human and microbial DNA (15). However, the method seems to be  
70 specially suited to study microbiomes, due to the inherent difficulty to authenticate their

71 ancient origin. This complication arises from the fact that microbes can colonize tissues  
72 at different times, resulting in different levels of deamination of microbial DNA in  
73 historical samples. Although sequences that carry terminal C-to-T substitutions can be  
74 selected *in silico* (16, 17), there are two factors that could hinder this approach. Firstly,  
75 low levels of deamination will reduce the number of molecules suitable for selection *in*  
76 *silico*. Secondly, high sequence divergence between samples and reference genomes  
77 can mask age-associated deamination signals thereby hinder authentication..  
78 Consequently, enriching for deaminated molecules during library preparation is  
79 fundamental to tackling these problems. As a proof-of-principle experiment, we used  
80 here U-selection in combination with taxonomic binning of Illumina sequenced reads to  
81 characterize the microbiomes of Neandertal bones (~39,000 years old), herbaria  
82 specimens (between 41 and 279 years old) and plant archaeological remains (~2,000  
83 years old) (Table 1).

84 **Table 1.** Provenance of herbarium specimens and archaeological remains

| ID             | Country of origin | Age                  | Species                     | Reference* |
|----------------|-------------------|----------------------|-----------------------------|------------|
| KM177500       | UK                | 171 <sup>+</sup>     | <i>Solanum tuberosum</i>    | 1          |
| KM177497       | UK                | 170 <sup>+</sup>     | <i>Solanum tuberosum</i>    | 1          |
| BM000815937    | UK                | 279 <sup>+</sup>     | <i>Solanum lycopersicum</i> | 2          |
| BH0000061459   | USA               | 119 <sup>+</sup>     | <i>Arabidopsis thaliana</i> | 3          |
| OSU13900       | USA               | 82 <sup>+</sup>      | <i>Arabidopsis thaliana</i> | 4          |
| NY1365364      | USA               | 127 <sup>+</sup>     | <i>Arabidopsis thaliana</i> | 5          |
| NY1365375      | USA               | 119 <sup>+</sup>     | <i>Arabidopsis thaliana</i> | 5          |
| CS5            | USA               | 1852 <sup>++</sup>   | <i>Zea mays</i>             | 6          |
| CS6            | USA               | Undated              | <i>Zea mays</i>             | 6          |
| CS20           | USA               | 1881 <sup>++</sup>   | <i>Zea mays</i>             | 6          |
| El Sidrón 1253 | Spain             | 39,000 <sup>++</sup> | Neanderthal                 | 7          |
| Vindija 33.17  | Croatia           | Undated              | Neanderthal                 | 8          |
| Vindija 33.19  | Croatia           | Undated              | Neanderthal                 | 8          |

85 \*<sup>1</sup>Kew Royal Botanical Gardens; <sup>2</sup>Natural History Museum, London; <sup>3</sup>Cornell Bailey  
86 Hortorium; <sup>4</sup>Ohio State University Herbarium; <sup>5</sup>New York Botanical Garden;  
87 <sup>6</sup>Turkey Pen Shelter, UTAH, USA; <sup>7</sup>El Sidrón Cave, Spain; <sup>8</sup>Vindija Cave, Croatia.

88 <sup>+</sup>Calculated from collection dates (in years).

89 <sup>++</sup>B.P. (Before present years)

## 90 **Results and Discussion**

91 Our experiments were motivated by the previous observation that in some  
92 Neandertal samples, e.g. from El Sidrón, Spain, the proportion of Neandertal DNA  
93 fragments remains unchanged in both the U-depleted and U-enriched fractions,  
94 whereas in others, from Vindija Cave, Croatia, this proportion increased in the  
95 Uracil-enriched fraction (15). It was hypothesized that the latter effect could have been

96 due to differences in deamination, and hence in age, between Neandertal- and  
97 microbial-derived DNA fragments. To explore this effect further, we re-analyzed the  
98 previously generated Neanderthal sequence data from both sites by performing  
99 taxonomic binning of reads derived from the U-depleted and U-enriched fractions,  
100 instead of aligning them only to the human reference genome, as had been done  
101 previously. Reads aligning to the two most abundant bacterial phyla (Actinobacteria and  
102 Proteobacteria) from the Vindija Neandertals were enriched in the U-depleted fraction,  
103 while hominid reads were enriched in the U-enriched fraction (Figure 1A). This is in  
104 accordance with a previous study that reported absence of DNA damage in  
105 Actinobacteria derived from a Neandertal bone from Vindija cave (18). In contrast, in  
106 reads obtained from the El Sidrón Neandertals, we found enrichment of both hominid  
107 and Actinobacteria reads in the U-enriched fraction, whereas Proteobacteria reads were  
108 enriched in the U-depleted fraction. (Figure 1B). Overall, bacteria-derived reads were  
109 dominated by the Actinobacteria *Streptosporangium roseum* (Figure 1C), which showed  
110 almost 50% deamination at the first base in the U-enriched fraction (Figure 1D),  
111 suggesting its ancient origin. The analysis of reads derived from Neandertal bones  
112 illustrates how U-selection permits distinguishing between ancient bacteria enriched in  
113 the U-enriched fraction and more recent colonizers enriched in the U-depleted fraction.

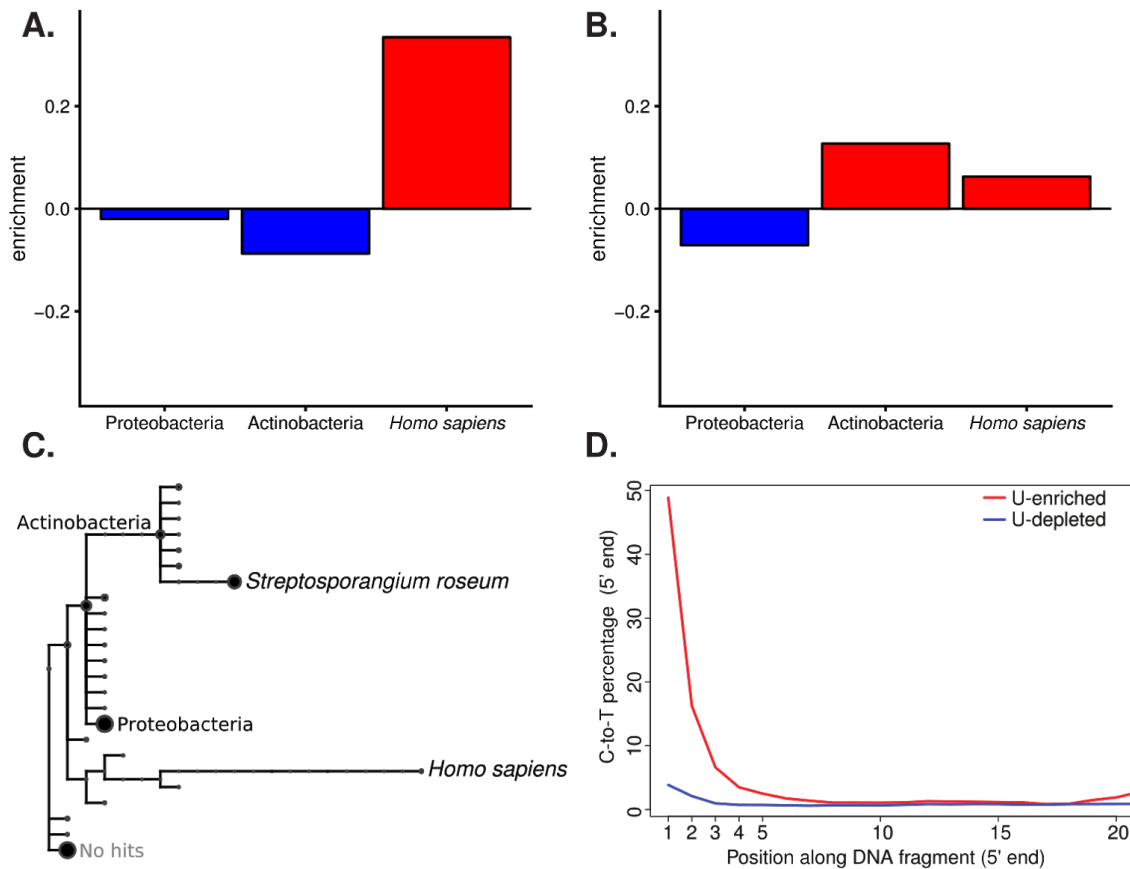

114 **Figure 1.** Relative enrichment, taxonomic assignment and substitution profiles of  
115 Neandertal-derived U-selected libraries. **A.** Relative enrichment (number of reads)  
116 in the U-enriched relative to the U-depleted fraction from Vindija Neandertal  
117 assigned to the phyla Actinobacteria and Proteobacteria, as well as to *Homo*  
118 *sapiens*. **B.** Relative enrichment (number of reads) in the U-enriched relative to  
119 the U-depleted fraction from Sidrón Neandertal assigned to the phyla  
120 Actinobacteria and Proteobacteria, as well as to *Homo sapiens*. **C.** Taxonomic tree  
121 of reads from Sidrón Neandertal assigned to different taxonomic levels. The size  
122 of the circle represents the amount of reads assigned to a particular part or the  
123 taxonomy. Assignments to the phyla Actinobacteria and Proteobacteria, as well as  
124 the species *Streptosporangium roseum* and *Homo sapiens* are named in the  
125 taxonomic tree. **D.** Cytosine to Thymine substitutions at the 5' end of reads aligned  
126 to *S. roseum* from the Sidrón Neandertal U-selected library (U-enriched and  
127 U-depleted fractions).



128           In order to further evaluate the performance of U-selection in characterizing  
129 microbial communities, we selected a set of plant samples (both herbaria specimens  
130 and archaeological remains) with low levels of deamination. We extracted DNA from  
131 plant samples and generated libraries using both a regular double-stranded (ds)  
132 approach (19), and U-selection (15). Sequences from the dsDNA libraries were then  
133 used as a baseline to evaluate depletion and enrichment of uracil-containing molecules  
134 (Figure 2A). U-selection successfully enriched for deaminated molecules in all plant  
135 samples, as it is manifest in the much higher levels of deamination present in the  
136 U-enriched fraction compared with the dsDNA libraries and the U-depleted fraction  
137 (Figure 2A-B). The plant samples showed substantial variation in the content of  
138 endogenous DNA (2.8-91%), which was very similar between the U-depleted and  
139 U-enriched fractions, indicating similar levels of deamination between host- and microbe  
140 derived reads (Figure S1A). Assuming that plant- and microbial-derived DNA deaminate  
141 at a similar rate (20), this observation indicates that microbes found in plant tissue were  
142 present at the time of collection or colonized the tissue shortly thereafter. The  
143 percentage of reads (including host-derived reads) that could be taxonomically binned  
144 varied depending on the sample (Figure S1B) and, since the host genome was included  
145 in the nucleotide database, positively correlated with the percentage of host  
146 endogenous DNA (Figure S1C). The inability to taxonomically assign the vast majority of  
147 reads from samples with low endogenous DNA reflects the incompleteness of the  
148 reference database compared to the diversity of the microbiomes in those samples.

149 Additionally, single stranded DNA library preparation methods as employed during Uracil  
150 enrichment generate shorter reads (21, 22), which are more difficult to map to a  
151 reference genome and to assign taxonomically to a nucleotide database. This is  
152 reflected in the higher percentage of reads mapped and assigned from the dsDNA  
153 library compared with shorter reads derived from both the U-depleted and U-enriched  
154 fraction (Figure S2A-B). Originally, it was reported that the U-enriched fraction shows a  
155 mild increase in GC-content (15), however in the plant libraries analyzed here we did not  
156 find a significant difference in GC-content between the U-depleted and U-enriched  
157 fractions (Figure S2C). In theory, since Us originate from Cs, the U-enriched fraction  
158 would be enriched for GC-rich species and GC-rich genomic regions within a given  
159 genome. However, as the enrichment would depend on the diversity of taxa present and  
160 their relative age difference, and hence difference in deamination, GC-biases, if any, are  
161 expected to be highly sample-dependent.

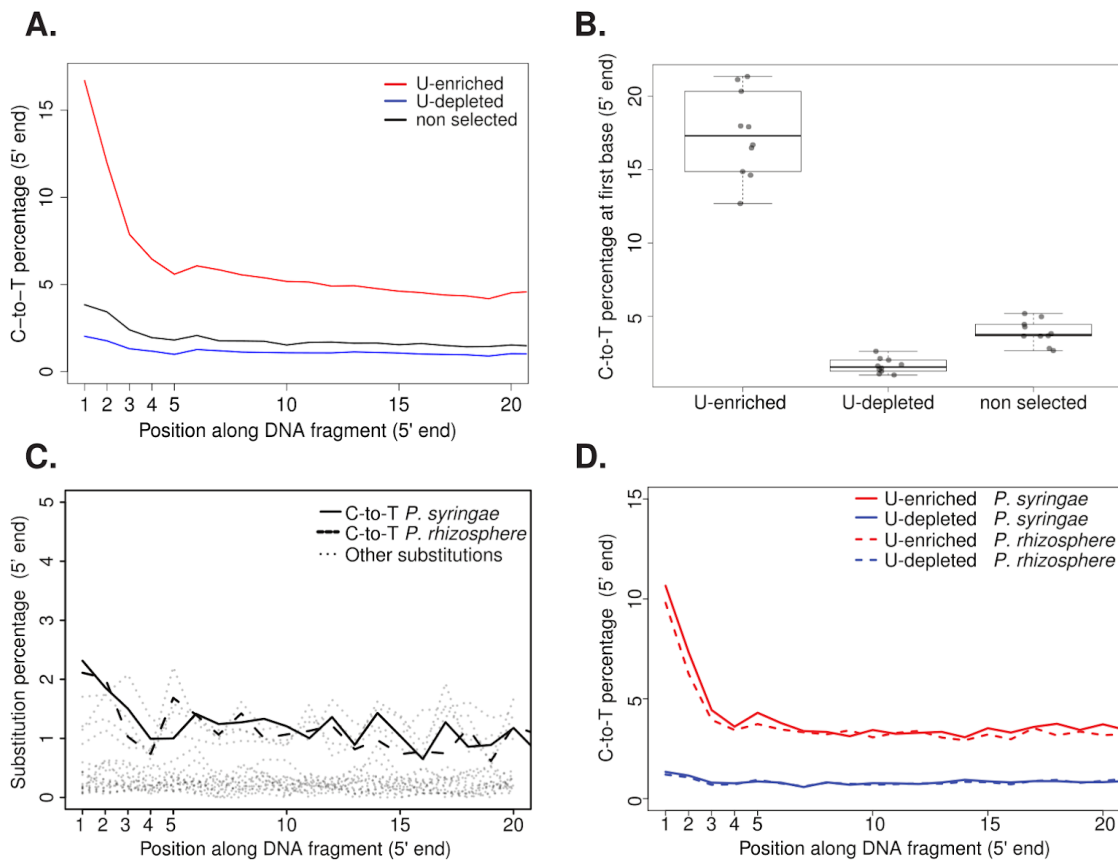

162 **Figure 2.** Patterns of cytosine to thymine (C-to-T) substitutions at the 5' end of  
163 plant- and *Pseudomonas*-derived reads. **A.** C-to-T substitutions at the 5' end of  
164 *Solanum tuberosum* sample KM177500 for a non-selected and U-selected library  
165 (U-enriched and U-depleted fractions). **B.** Distributions of C-to-T substitution  
166 percentage at first base (5' end) for non-selected and U-selected libraries  
167 (U-enriched and U-depleted fractions). Median values are denoted as black lines  
168 and points show the original value for each individual sample. **C.** Substitution  
169 patterns at the 5' end of *Pseudomonas syringae* and *Pseudomonas rhizosphere*  
170 mapped reads from a non-selected library from a *Solanum tuberosum* sample  
171 KM177500. **D.** Cytosine to Thymine substitutions at the 5' end of *P. syringae* and  
172 *P. rhizosphere* mapped reads from a U-selected library (U-enriched and  
173 U-depleted fractions) from a *Solanum tuberosum* sample KM177500.

174           Given the low taxonomic diversity of microorganisms in the samples included in  
175 our proof-of-principle experiment, instead of centering our analyses on the  
176 compositional assessment of microbial communities, we investigated in detail samples  
177 in which a specific microbe or group of microbes were more prevalent based on read  
178 abundance. We identified a large number of reads that were assigned to the bacterium  
179 *Pantoea vagans* in a potato (*Solanum tuberosum*) and a maize (*Zea mays*) sample  
180 (Figure S3). In both samples we found patterns of C-to-T substitutions that suggest the  
181 historical nature of the sequenced reads (Figure 3A). Since *P. vagans* is a plant epiphyte  
182 (23), it is not entirely surprising to find it in two different plant species. We compared the  
183 potato and maize *P. vagans* with publicly available genomes using single nucleotide  
184 polymorphisms (SNPs) ascertained in these modern samples. Our analysis linked the  
185 two historical strains to a distinct cluster of modern strains based on genetic similarity  
186 (Figure 3B). Based on a set of 432,891 SNPs, the two historical isolates showed 95%  
187 SNP identity between them, and an average of 92% SNP identity between historical and  
188 modern strains of the same cluster. Conversely, comparisons between historical strains  
189 and any modern strain of a different cluster showed only an average of 59% identity at  
190 variable positions.

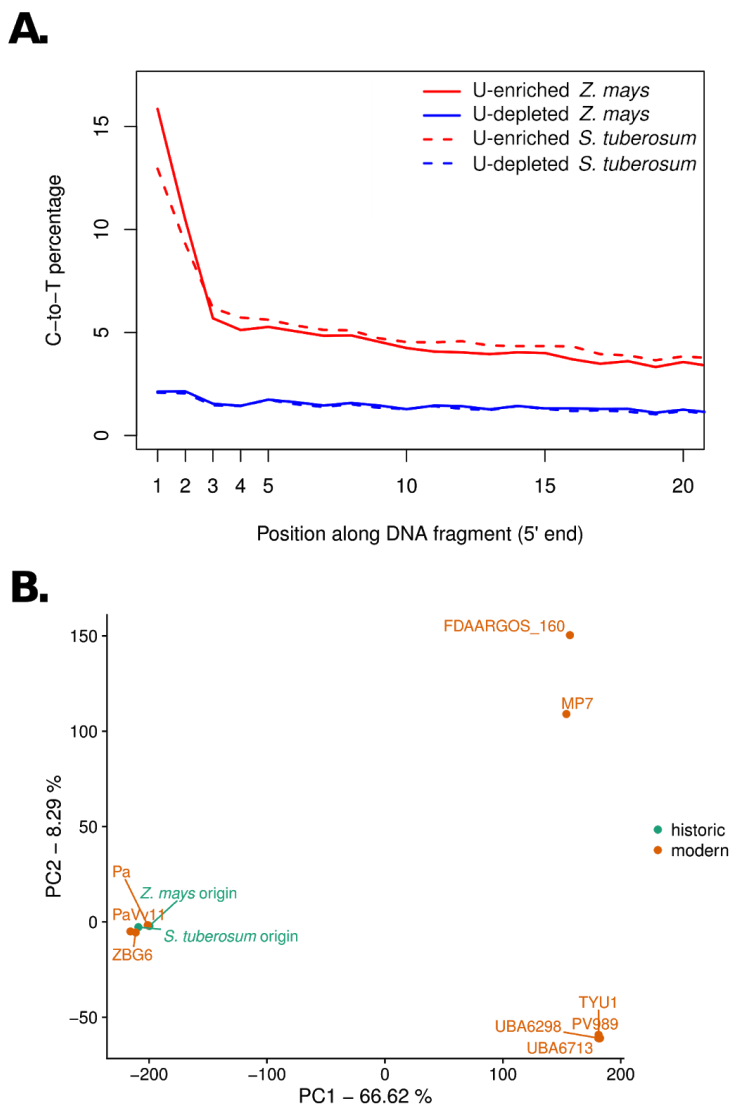

191 **Figure 3.** Substitution patterns and genetic distances of the bacterium *Pantoea*  
192 *vagans* identified from *Zea mays* and *Solanum tuberosum* samples (same  
193 samples as in Figure S3). **A.** Cytosine to Thymine substitutions at the 5' end of *P.*  
194 *vagans* for U-selected libraries (U-enriched and U-depleted fractions) from *Z.*  
195 *mays* and *S. tuberosum*. **B.** Principal component analysis of *P. vagans* from *Z.*  
196 *mays* and *S. tuberosum* samples, as well as nine publicly available genomes,  
197 based on single nucleotide polymorphisms. Numbers in axis labels indicate the  
198 percentage of the variance explained by each principal component (PC).

199 In a potato sample, in which the pathogenic oomycete *Phytophthora infestans*  
200 was previously identified (6), we found a large portion of reads assigned to the bacterial  
201 genus *Pseudomonas*. Reads were assigned in particular to the species *Pseudomonas*  
202 *syringae* and *Pseudomonas rhizosphere* in different proportions (Figure S4). We  
203 performed de novo assembly using reads assigned to the genus *Pseudomonas* and  
204 aligned the contigs to the reference genomes of *P. syringae* and *P. rhizosphere* covering  
205 about 80% of both reference genomes (Figure S5). We subsequently filtered for contigs  
206 that aligned uniquely to either *P. syringae* and *P. rhizosphere* genomes and found  
207 different k-mer coverage distributions in contigs aligning uniquely to each genome  
208 (Figure S6), an observation that reinforced our confidence in the presence of the two  
209 *Pseudomonas* species in this sample. Due to the high level of sequence divergence  
210 between the *Pseudomonas* in our sample and the reference genomes present in the  
211 database, it is difficult to assess typical deamination patterns in the dsDNA library  
212 (Figure 2C). However, we were able to examine damage patterns in both *Pseudomonas*  
213 species using the U-enriched fraction (Figure 2D), since the C-to-T signal is amplified  
214 and is much higher than the basal level of substitutions.

215 In summary, we showed here that the U-selection method selectively enriches for  
216 authentic microbial aDNA molecules in samples from plant and animal tissues with a  
217 wide-distribution of ages and deamination levels. For instance, in *P. vagans*, U-selection  
218 increases the fraction of molecules carrying a terminal C-to-T substitution at the 5'-end  
219 2-3 fold over the library without enrichment, relative to the total number of molecules

220 sequenced. We think that the application of U-selection for ancient microbiome research  
221 will be particularly useful in both samples with minute levels of deamination, where the  
222 nucleotide divergence between samples and reference genomes will obscure the  
223 identification of the C-to-T pattern typical of aDNA, as well as in moderately or heavily  
224 deaminated samples which carry modern contaminants, since in those samples ancient  
225 taxa would be efficiently enriched. Since it is extremely difficult to differentiate between  
226 ante-mortem and early post-mortem colonizers based only on deamination patterns, it is  
227 fundamental to also evaluate the biological relevance of detected taxa by comparing  
228 them with reference modern microbiomes.

## 229 **Materials and Methods**

### 230 **Plant Samples**

231 We used herbarium specimens from three different plant species (*Arabidopsis thaliana*,  
232 *Solanum tuberosum*, and *Solanum lycopersicum*) with ages ranging from 41 to 279  
233 years (Table 1). *S. tuberosum* herbarium specimens were documented to be infected by  
234 *Phytophthora infestans* (6). We used also *Zea mays* archaeological remains excavated  
235 in the Turkey Penn shelter in Utah, USA (24). The *Zea mays* samples were dated using  
236 accelerator mass spectrometry and have ages ranging between 1852 and 1881 years  
237 BP (Before Present) (Table 1). The sequencing data for these samples is available on  
238 the European Nucleotide Archive under study number PRJEB30666.

### 239 **Neanderthal samples**

240 We used Neanderthal samples (Table 1) prepared by (15), which were sequenced  
241 deeper for this study.

### 242 **DNA extraction and library preparation**

243 DNA from all herbarium specimens and plant archaeological remains was performed as  
244 previously described (6).

245 For each plant sample two libraries were produced, one using a double-stranded library  
246 preparation (19, 25) and the second using the single-stranded U-selection protocol (15)



247 without enzymatic removal of uracils (26).

## 248 **Sequencing and initial data processing**

249 Since the length of aDNA molecules is in most of the cases shorter than the read length  
250 of the sequencing platform, it is possible that a fragment of the aDNA molecule is  
251 sequenced by both the forward and reverse read, and also that a part of the adaptor is  
252 sequenced (27). Therefore, it is recommended to merge sequences based on the  
253 overlapping fraction sequenced by both forward and reverse reads (27). We remove  
254 adaptors and merged sequences using the software leeHom with the “--ancientdna”  
255 option (28). Putative chimeric sequences were flagged as failing quality.

## 256 **Mapping of sequenced reads to their host genome**

257 Merged reads were mapped as single-ended reads to their respective or most closely  
258 relative genome: *Zea mays* (29), *Arabidopsis thaliana* (30, 31), *Solanum tuberosum*  
259 (32), *Solanum lycopersicum* (33), *Homo sapiens* (Genome Reference Consortium  
260 Human Build 37). The mapping was performed using BWA-MEM (version 0.7.10) with  
261 default parameters, which includes a minimum length cutoff of 30 bp (34).

## 262 **Metagenomics assignment of sequenced reads**

263 Reads were aligned to the full non-redundant NCBI nucleotide collection (nt) database  
264 (downloaded January 2015) using MALT (version 0.0.12, (35)) in BlastN mode. The  
265 resulting RMA files were analyzed using MEGAN (version 5.11.3, (36)). The reads were

266 assigned to the NCBI taxonomy using a lowest common ancestor algorithm (36).

## 267 **Mapping of sequenced reads to microbial genomes**

268 Libraries were mapped to microbial reference genomes of interest, after the presence of  
269 certain taxa was detected during metagenomic assignment. Specifically, the references  
270 of *Streptosporangium roseum* (37), *Pseudomonas syringae* pv. *syringae* B728a (38),  
271 *Pseudomonas rhizosphaerae* (39) and *Pantoea vagans* (23) were used. Since mapping  
272 metagenomic libraries to bacterial reference genomes is very prone to false alignments,  
273 we used a different mapping strategy for these genomes. The mappings were  
274 performed with bowtie2 (version 2.2.4, (40)), with the settings “--score-min 'L,-0.3,-0.3'  
275 --sensitive --end-to-end” to increase stringency.

## 276 **Assessment of nucleotide substitution patterns**

277 All types of nucleotide substitutions relative to the reference genome were calculated  
278 per library using mapDamage 2.0 (v. 2.0.2–12, (41)). The percentages of C-to-T  
279 substitutions at the 5' end were extracted from the output file 5pCtoT\_freq.txt produced  
280 by mapDamage.

## 281 ***Pantoea vagans* genomic variation**

282 In order to reduce the effect of aDNA-associated C-to-T substitutions on variant  
283 discovery, we used exclusively the U-depleted fraction of libraries where *P. vagans* was  
284 detected in the metagenomic screening. The libraries were mapped to the *P. vagans*

285 reference genome using BWA-MEM, to reduce reference bias and increase SNP  
286 discovery. False alignments from the metagenomic libraries posed a lesser problem  
287 here, as variants were ascertained based on modern material. Variants for historical  
288 samples were called for both libraries together using the bcftools (version 1.8, (42))  
289 utilities mpileup (“bcftools mpileup -q 1 -l -Ou -f \$REF \$IN1 \$IN2”) and call (“bcftools call  
290 --ploidy 1 -m -O -z”). Additionally, 11 assemblies of different contiguity were downloaded  
291 from NCBI (<https://www.ncbi.nlm.nih.gov/genome/genomes/2707>). These assemblies  
292 were aligned to the reference genome using minimap2 (version 2.10-r764, (43)) and its  
293 “asm20” parameter preset. Only strains with at least 80% reference coverage were kept  
294 for subsequent analysis (9/11, average reference coverage: 91%). The pafutils utility,  
295 which is distributed with minimap2, was used to call variants from these alignments, with  
296 the parameter set “-l 2000 -L 5000”. All resulting VCF files from modern samples were  
297 merged using bcftools’ merge utility with the parameter “--missing-to-ref”, assuming that  
298 those positions not called by pafutils in any one sample were indeed reference calls.  
299 The merged VCF from modern material was then merged with the VCF from the two  
300 historical samples using bcftools (version 1.8, (42)), and filtered to include only full  
301 information, biallelic SNPs. This approach discovers sites, which are segregating in  
302 modern material, and have read data (be it reference, alternative or segregating sites) in  
303 both historical samples. The resulting VCF file was loaded into R using vcfR (version  
304 1.7.0, (44)), and a PCA was produced by converting the information into a genlight  
305 object using adegenet (version 2.0.1, (45)) in R (version 3.3.3, (46)).

306 ***Pseudomonas* spp. assembly and evaluation**

307 To evaluate the presence of *Pseudomonas* spp. strains in a *Solanum tuberosum* historic  
308 herbarium sample, we extracted from this library all reads that were taxonomically  
309 assigned to the *Pseudomonas* genus or to inferior taxonomic levels within it. These  
310 reads were then assembled using SPAdes (version 3.5.0) with default parameters (47).  
311 The resulting contigs were filtered for a minimum length of 2Kb, which yielded 3,314  
312 contigs with a total length of 16Mb. We used the lastz (version 1.03.66, (48)) and Circos  
313 (version 0.64, (49)) interface of AliTV (50) to align these contigs to either the *P. syringae*  
314 or *P. rhizosphaerae* reference genome. We were able to align 72% of contigs to either  
315 one or both of these reference genomes in alignments of at least 1Kb. We then  
316 extracted all contigs which had alignments of at least 10Kb in length and were unique to  
317 one of the reference genomes. These sets of contigs were again aligned to their  
318 corresponding reference using AliTV as described above. Additionally, we used these  
319 uniquely aligning contigs to assess their average kmer coverage during the assembly,  
320 as reported by SPAdes.

321 **Acknowledgements**

322 We thank Verena Schuenemann for help in the laboratory; Patricia Lang, Claudia S.  
323 Burbano, members of the Research Group for Ancient Genomics and Evolution, and  
324 specially Talia Karasov for input on data analysis and comments on the manuscript;  
325 Janet Kelso for help with processing the raw sequencing data; Ivan Gusic, Zeljko Kucan,  
326 Carles Lalueza-Fox, Marco de la Rasilla, Antonio Rosas, Pavao Rudan, Sandra Knapp,  
327 Bruce Benz, Michael Blake, R.G. Matson, Bryn Dentinger, Anna Stalter, Robert Capers,  
328 John Peter for providing samples. This work was funded by the Max Planck Society and  
329 its Presidential Innovation Fund.

330 **References**

- 331 1. Poinar HN, Schwarz C, Qi J, Shapiro B, Macphee RDE, Buigues B, Tikhonov A,  
332 Huson DH, Tomsho LP, Auch A, Rampp M, Miller W, Schuster SC. 2006.  
333 Metagenomics to paleogenomics: large-scale sequencing of mammoth DNA.  
334 Science 311:392–394.
- 335 2. Gutaker RM, Burbano HA. 2017. Reinforcing plant evolutionary genomics using  
336 ancient DNA. Curr Opin Plant Biol 36:38–45.
- 337 3. Orlando L, Gilbert MTP, Willerslev E. 2015. Reconstructing ancient genomes and  
338 epigenomes. Nat Rev Genet 16:395–408.
- 339 4. Warinner C, Herbig A, Mann A, Fellows Yates JA, Weiß CL, Burbano HA, Orlando  
340 L, Krause J. 2017. A Robust Framework for Microbial Archaeology. Annu Rev  
341 Genomics Hum Genet 18:321–356.
- 342 5. Bos KI, Schuenemann VJ, Golding GB, Burbano HA, Waglechner N, Coombes BK,  
343 McPhee JB, DeWitte SN, Meyer M, Schmedes S, Wood J, Earn DJD, Herring DA,  
344 Bauer P, Poinar HN, Krause J. 2011. A draft genome of *Yersinia pestis* from victims  
345 of the Black Death. Nature 478:506–510.
- 346 6. Yoshida K, Schuenemann VJ, Cano LM, Pais M, Mishra B, Sharma R, Lanz C,  
347 Martin FN, Kamoun S, Krause J, Thines M, Weigel D, Burbano HA. 2013. The rise  
348 and fall of the *Phytophthora infestans* lineage that triggered the Irish potato famine.

- 349 Elife 2:e00731.
- 350 7. Adler CJ, Dobney K, Weyrich LS, Kaidonis J, Walker AW, Haak W, Bradshaw CJA,  
351 Townsend G, Soltysiak A, Alt KW, Parkhill J, Cooper A. 2013. Sequencing ancient  
352 calcified dental plaque shows changes in oral microbiota with dietary shifts of the  
353 Neolithic and Industrial revolutions. *Nat Genet* 45:450–5, 455e1.
- 354 8. Warinner C, Rodrigues JFM, Vyas R, Trachsel C, Shved N, Grossmann J, Radini A,  
355 Hancock Y, Tito RY, Fiddyment S, Speller C, Hendy J, Charlton S, Luder HU,  
356 Salazar-García DC, Eppler E, Seiler R, Hansen LH, Castruita JAS,  
357 Barkow-Oesterreicher S, Teoh KY, Kelstrup CD, Olsen JV, Nanni P, Kawai T,  
358 Willerslev E, von Mering C, Lewis CM Jr, Collins MJ, Gilbert MTP, Rühli F,  
359 Cappellini E. 2014. Pathogens and host immunity in the ancient human oral cavity.  
360 *Nat Genet* 46:336–344.
- 361 9. Weyrich LS, Duchene S, Soubrier J, Arriola L, Llamas B, Breen J, Morris AG, Alt  
362 KW, Caramelli D, Dresely V, Farrell M, Farrer AG, Francken M, Gully N, Haak W,  
363 Hardy K, Harvati K, Held P, Holmes EC, Kaidonis J, Lalueza-Fox C, de la Rasilla M,  
364 Rosas A, Semal P, Soltysiak A, Townsend G, Usai D, Wahl J, Huson DH, Dobney  
365 K, Cooper A. 2017. Neanderthal behaviour, diet, and disease inferred from ancient  
366 DNA in dental calculus. *Nature*.
- 367 10. Boast AP, Weyrich LS, Wood JR, Metcalf JL, Knight R, Cooper A. 2018. Coprolites  
368 reveal ecological interactions lost with the extinction of New Zealand birds. *Proc*

- 369 Natl Acad Sci U S A 115:1546–1551.
- 370 11. Briggs AW, Stenzel U, Johnson PLF, Green RE, Kelso J, Prüfer K, Meyer M, Krause  
371 J, Ronan MT, Lachmann M, Pääbo S. 2007. Patterns of damage in genomic DNA  
372 sequences from a Neandertal. *Proceedings of the National Academy of Sciences*  
373 104:14616–14621.
- 374 12. Krause J, Briggs AW, Kircher M, Maricic T, Zwyns N, Derevianko A, Pääbo S. 2010.  
375 A Complete mtDNA Genome of an Early Modern Human from Kostenki, Russia.  
376 *Curr Biol* 20:231–236.
- 377 13. Prüfer K, Meyer M. 2015. Comment on “Late Pleistocene human skeleton and  
378 mtDNA link Paleoamericans and modern Native Americans.” *Science* 347:835–835.
- 379 14. Weiß CL, Dannemann M, Prüfer K, Burbano HA. 2015. Contesting the presence of  
380 wheat in the British Isles 8,000 years ago by assessing ancient DNA authenticity  
381 from low-coverage data. *Elife* 4.
- 382 15. Gansauge M-T, Meyer M. 2014. Selective enrichment of damaged DNA molecules  
383 for ancient genome sequencing. *Genome Res* 24:1543–1549.
- 384 16. Skoglund P, Malmström H, Raghavan M, Storå J, Hall P, Willerslev E, Gilbert MTP,  
385 Götherström A, Jakobsson M. 2012. Origins and genetic legacy of Neolithic farmers  
386 and hunter-gatherers in Europe. *Science* 336:466–469.



- 387 17. Meyer M, Fu Q, Aximu-Petri A, Glocke I, Nickel B, Arsuaga J-L, Martínez I, Gracia  
388 A, de Castro JMB, Carbonell E, Pääbo S. 2014. A mitochondrial genome sequence  
389 of a hominin from Sima de los Huesos. *Nature* 505:403–406.
- 390 18. Zaremba-Niedźwiedzka K, Andersson SGE. 2013. No ancient DNA damage in  
391 Actinobacteria from the Neanderthal bone. *PLoS One* 8:e62799.
- 392 19. Meyer M, Kircher M. 2010. Illumina sequencing library preparation for highly  
393 multiplexed target capture and sequencing. *Cold Spring Harb Protoc*  
394 2010:db.prot5448.
- 395 20. Weiß CL, Schuenemann VJ, Devos J, Shirsekar G, Reiter E, Gould BA,  
396 Stinchcombe JR, Krause J, Burbano HA. 2016. Temporal patterns of damage and  
397 decay kinetics of DNA retrieved from plant herbarium specimens. *R Soc Open Sci*  
398 3:160239.
- 399 21. Gansauge M-T, Meyer M. 2013. Single-stranded DNA library preparation for the  
400 sequencing of ancient or damaged DNA. *Nat Protoc* 8:737–748.
- 401 22. Gansauge M-T, Gerber T, Glocke I, Korlević P, Lippik L, Nagel S, Riehl LM, Schmidt  
402 A, Meyer M. 2017. Single-stranded DNA library preparation from highly degraded  
403 DNA using T4 DNA ligase. *Nucleic Acids Res.*
- 404 23. Smits THM, Rezzonico F, Kamber T, Goesmann A, Ishimaru CA, Stockwell VO,  
405 Frey JE, Duffy B. 2010. Genome sequence of the biocontrol agent *Pantoea vagans*

- 406 strain C9-1. *J Bacteriol* 192:6486–6487.
- 407 24. Matson RG, Chisholm B. 1991. Basketmaker II Subsistence: Carbon Isotopes and  
408 Other Dietary Indicators from Cedar Mesa, Utah. *Am Antiq* 56:444–459.
- 409 25. Kircher M, Sawyer S, Meyer M. 2012. Double indexing overcomes inaccuracies in  
410 multiplex sequencing on the Illumina platform. *Nucleic Acids Res* 40:e3.
- 411 26. Briggs AW, Stenzel U, Meyer M, Krause J, Kircher M, Pääbo S. 2010. Removal of  
412 deaminated cytosines and detection of in vivo methylation in ancient DNA. *Nucleic  
413 Acids Res* 38:e87.
- 414 27. Kircher M. 2012. Analysis of high-throughput ancient DNA sequencing data.  
415 *Methods Mol Biol* 840:197–228.
- 416 28. Renaud G, Stenzel U, Kelso J. 2014. leeHom: adaptor trimming and merging for  
417 Illumina sequencing reads. *Nucleic Acids Res* 42:e141.
- 418 29. Schnable PS, Ware D, Fulton RS, Stein JC, Wei F, Pasternak S, Liang C, Zhang J,  
419 Fulton L, Graves TA, Minx P, Reily AD, Courtney L, Kruchowski SS, Tomlinson C,  
420 Strong C, Delehaunty K, Fronick C, Courtney B, Rock SM, Belter E, Du F, Kim K,  
421 Abbott RM, Cotton M, Levy A, Marchetto P, Ochoa K, Jackson SM, Gillam B, Chen  
422 W, Yan L, Higginbotham J, Cardenas M, Waligorski J, Applebaum E, Phelps L,  
423 Falcone J, Kanchi K, Thane T, Scimone A, Thane N, Henke J, Wang T, Ruppert J,  
424 Shah N, Rotter K, Hodges J, Ingenthron E, Cordes M, Kohlberg S, Sgro J, Delgado

- 425 B, Mead K, Chinwalla A, Leonard S, Crouse K, Collura K, Kudrna D, Currie J, He R,  
426 Angelova A, Rajasekar S, Mueller T, Lomeli R, Scara G, Ko A, Delaney K,  
427 Wissotski M, Lopez G, Campos D, Braidotti M, Ashley E, Golser W, Kim H, Lee S,  
428 Lin J, Dujmic Z, Kim W, Talag J, Zuccolo A, Fan C, Sebastian A, Kramer M, Spiegel  
429 L, Nascimento L, Zutavern T, Miller B, Ambroise C, Muller S, Spooner W,  
430 Narechania A, Ren L, Wei S, Kumari S, Faga B, Levy MJ, McMahan L, Van Buren  
431 P, Vaughn MW, Ying K, Yeh C-T, Emrich SJ, Jia Y, Kalyanaraman A, Hsia A-P,  
432 Barbazuk WB, Baucom RS, Brutnell TP, Carpita NC, Chaparro C, Chia J-M,  
433 Deragon J-M, Estill JC, Fu Y, Jeddelloh JA, Han Y, Lee H, Li P, Lisch DR, Liu S, Liu  
434 Z, Nagel DH, McCann MC, SanMiguel P, Myers AM, Nettleton D, Nguyen J,  
435 Penning BW, Ponnala L, Schneider KL, Schwartz DC, Sharma A, Soderlund C,  
436 Springer NM, Sun Q, Wang H, Waterman M, Westerman R, Wolfgruber TK, Yang L,  
437 Yu Y, Zhang L, Zhou S, Zhu Q, Bennetzen JL, Dawe RK, Jiang J, Jiang N, Presting  
438 GG, Wessler SR, Aluru S, Martienssen RA, Clifton SW, McCombie WR, Wing RA,  
439 Wilson RK. 2009. The B73 maize genome: complexity, diversity, and dynamics.  
440 *Science* 326:1112–1115.
- 441 30. Arabidopsis Genome Initiative. 2000. Analysis of the genome sequence of the  
442 flowering plant *Arabidopsis thaliana*. *Nature* 408:796–815.
- 443 31. Swarbreck D, Wilks C, Lamesch P, Berardini TZ, Garcia-Hernandez M, Foerster H,  
444 Li D, Meyer T, Muller R, Ploetz L, Radenbaugh A, Singh S, Swing V, Tissier C,  
445 Zhang P, Huala E. 2008. The Arabidopsis Information Resource (TAIR): gene

- 446 structure and function annotation. *Nucleic Acids Res* 36:D1009–14.
- 447 32. Potato Genome Sequencing Consortium, Xu X, Pan S, Cheng S, Zhang B, Mu D,  
448 Ni P, Zhang G, Yang S, Li R, Wang J, Orjeda G, Guzman F, Torres M, Lozano R,  
449 Ponce O, Martinez D, De la Cruz G, Chakrabarti SK, Patil VU, Skryabin KG,  
450 Kuznetsov BB, Ravin NV, Kolganova TV, Beletsky AV, Mardanov AV, Di Genova A,  
451 Bolser DM, Martin DMA, Li G, Yang Y, Kuang H, Hu Q, Xiong X, Bishop GJ,  
452 Sagredo B, Mejía N, Zagorski W, Gromadka R, Gawor J, Szczesny P, Huang S,  
453 Zhang Z, Liang C, He J, Li Y, He Y, Xu J, Zhang Y, Xie B, Du Y, Qu D, Bonierbale M,  
454 Ghislain M, Herrera M del R, Giuliano G, Pietrella M, Perrotta G, Facella P, O'Brien  
455 K, Feingold SE, Barreiro LE, Massa GA, Diambra L, Whitty BR, Vaillancourt B, Lin  
456 H, Massa AN, Geoffroy M, Lundback S, DellaPenna D, Buell CR, Sharma SK,  
457 Marshall DF, Waugh R, Bryan GJ, Destefanis M, Nagy I, Milbourne D, Thomson SJ,  
458 Fiers M, Jacobs JME, Nielsen KL, Sønderkær M, Iovene M, Torres GA, Jiang J,  
459 Veilleux RE, Bachem CWB, de Boer J, Borm T, Kloosterman B, van Eck H, Datema  
460 E, Hekkert B te L, Goverse A, van Ham RCHJ, Visser RGF. 2011. Genome  
461 sequence and analysis of the tuber crop potato. *Nature* 475:189–195.
- 462 33. Tomato Genome Consortium. 2012. The tomato genome sequence provides  
463 insights into fleshy fruit evolution. *Nature* 485:635–641.
- 464 34. Li H. 2013. Aligning sequence reads, clone sequences and assembly contigs with  
465 BWA-MEM. arXiv [q-bioGN].

- 466 35. Herbig A, Maixner F, Bos KI, Zink A, Krause J, Huson DH. 2016. MALT: Fast  
467 alignment and analysis of metagenomic DNA sequence data applied to the  
468 Tyrolean Iceman. bioRxiv.
- 469 36. Huson DH, Auch AF, Qi J, Schuster SC. 2007. MEGAN analysis of metagenomic  
470 data. *Genome Res* 17:377–386.
- 471 37. Nolan M, Sikorski J, Jando M, Lucas S, Lapidus A, Del Rio TG, Chen F, Tice H,  
472 Pitluck S, Cheng J-F, Others. 2010. Complete genome sequence of  
473 *Streptosporangium roseum* type strain (NI 9100 T). *Stand Genomic Sci* 2:29.
- 474 38. Feil H, Feil WS, Chain P, Larimer F, DiBartolo G, Copeland A, Lykidis A, Trong S,  
475 Nolan M, Goltsman E, Thiel J, Malfatti S, Loper JE, Lapidus A, Detter JC, Land M,  
476 Richardson PM, Kyrpides NC, Ivanova N, Lindow SE. 2005. Comparison of the  
477 complete genome sequences of *Pseudomonas syringae* pv. *syringae* B728a and  
478 pv. *tomato* DC3000. *Proc Natl Acad Sci U S A* 102:11064–11069.
- 479 39. Kwak Y, Jung BK, Shin J-H. 2015. Complete genome sequence of *Pseudomonas*  
480 *rhizosphaerae* IH5 T (= DSM 16299 T), a phosphate-solubilizing rhizobacterium for  
481 bacterial biofertilizer. *J Biotechnol* 193:137–138.
- 482 40. Langmead B, Salzberg SL. 2012. Fast gapped-read alignment with Bowtie 2. *Nat*  
483 *Methods* 9:357–359.
- 484 41. Jónsson H, Ginolhac A, Schubert M, Johnson PLF, Orlando L. 2013.

- 485 mapDamage2.0: fast approximate Bayesian estimates of ancient DNA damage  
486 parameters. *Bioinformatics* 29:1682–1684.
- 487 42. Li H. 2011. A statistical framework for SNP calling, mutation discovery, association  
488 mapping and population genetical parameter estimation from sequencing data.  
489 *Bioinformatics* 27:2987–2993.
- 490 43. Li H. 2018. Minimap2: pairwise alignment for nucleotide sequences. *Bioinformatics*.
- 491 44. Knaus BJ, Grünwald NJ. 2017. vcfr: a package to manipulate and visualize variant  
492 call format data in R. *Mol Ecol Resour* 17:44–53.
- 493 45. Jombart T, Ahmed I. 2011. adegenet 1.3-1: new tools for the analysis of  
494 genome-wide SNP data. *Bioinformatics* 27:3070–3071.
- 495 46. R Development Core Team. 2008. R: A Language and Environment for Statistical  
496 Computing. R Foundation for Statistical Computing, Vienna, Austria.
- 497 47. Bankevich A, Nurk S, Antipov D, Gurevich AA, Dvorkin M, Kulikov AS, Lesin VM,  
498 Nikolenko SI, Pham S, Prjibelski AD, Pyshkin AV, Sirotkin AV, Vyahhi N, Tesler G,  
499 Alekseyev MA, Pevzner PA. 2012. SPAdes: a new genome assembly algorithm and  
500 its applications to single-cell sequencing. *J Comput Biol* 19:455–477.
- 501 48. Harris RS. 2007. Improved pairwise alignment of genomic DNA. The Pennsylvania  
502 State University.

- 503 49. Krzywinski M, Schein J, Birol I, Connors J, Gascoyne R, Horsman D, Jones SJ,  
504 Marra MA. 2009. Circos: an information aesthetic for comparative genomics.  
505 Genome Res 19:1639–1645.
- 506 50. Hohlfeld S, Ankenbrand M, Förster F, Hackl T. 2016. AliTV: Version 0.4.1. Zenodo.

507 **Supplementary Figures**

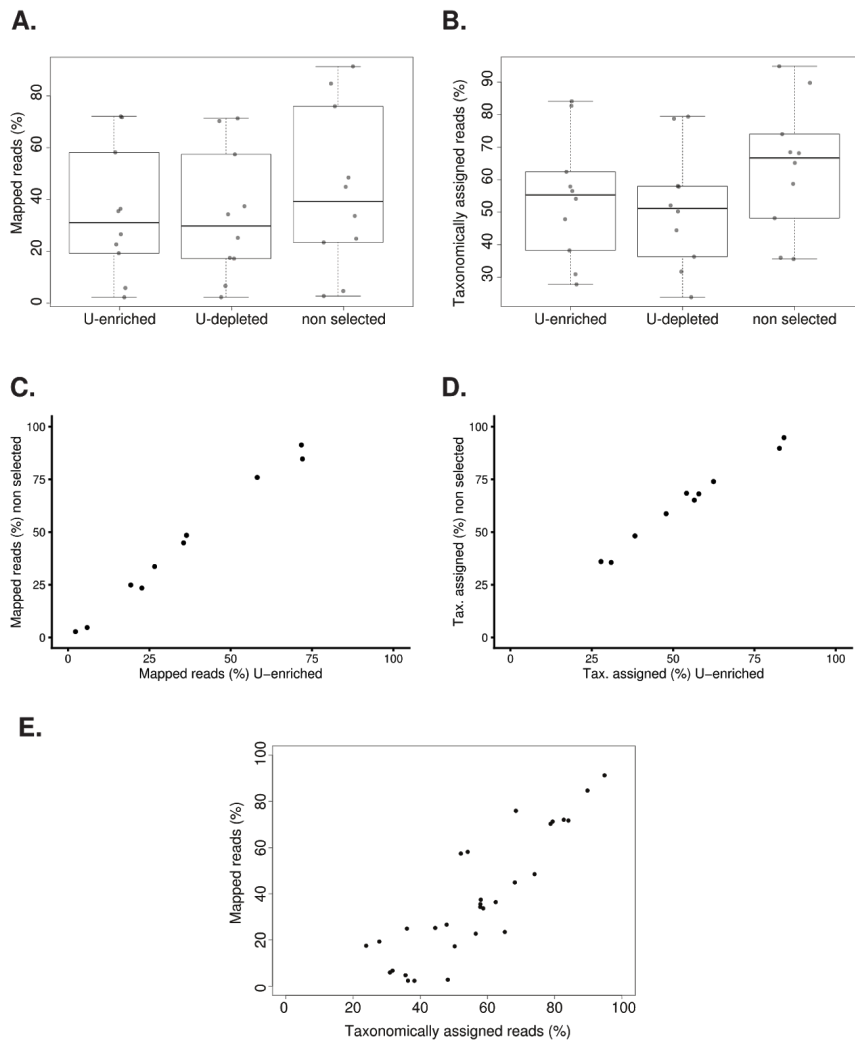

508 **Figure S1.** Mapped and taxonomically assigned reads of plant historical specimens. **A.**  
509 Distributions of percentage of mapped reads for non-selected and U-selected libraries  
510 (U-enriched and U-depleted fractions). **B.** Distributions of percentage of taxonomically  
511 assigned reads for non-selected and U-selected libraries (U-enriched and U-depleted  
512 fractions). **C.** Correlation of the percentage of mapped reads between the U-enriched  
513 and the non-selected library **D.** Correlation of the percentage of taxonomically assigned  
514 reads between the U-enriched and the non-selected library **E.** Relation between  
515 percentages of mapped and taxonomically assigned reads from U-selected libraries  
516 (U-enriched fraction).



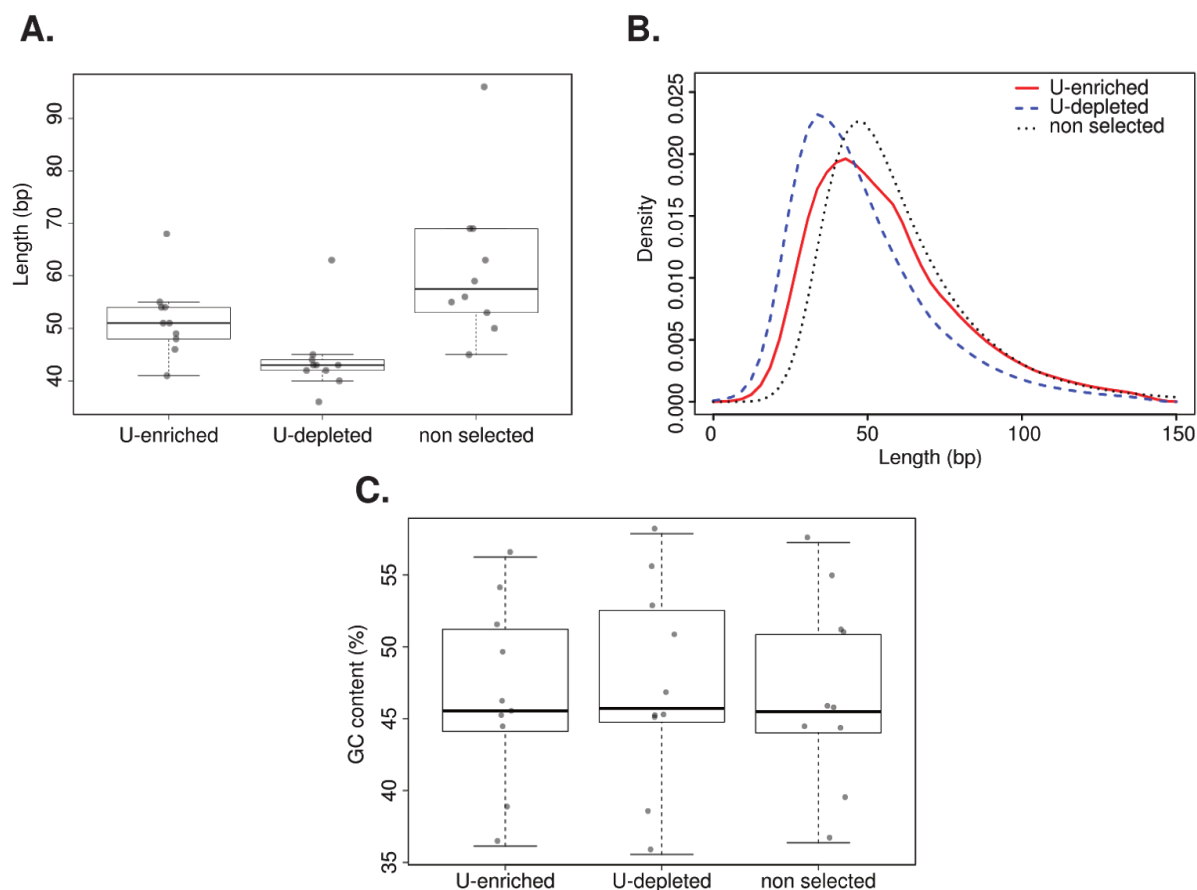

517 **Figure S2.** Length and GC content of plant historical specimens. **A.** Distributions of  
518 mean length for non-selected and U-selected libraries (U-enriched and U-depleted  
519 fractions). Median values are denoted as black lines and points show the original value  
520 for each individual sample. **B.** Length distribution of *Arabidopsis thaliana* sample  
521 NY1365375 for a non-selected and U-selected library (U-enriched and U-depleted  
522 fractions). **C.** Distributions of mean GC content for non-selected and U-selected libraries  
523 (U-enriched and U-depleted fractions).

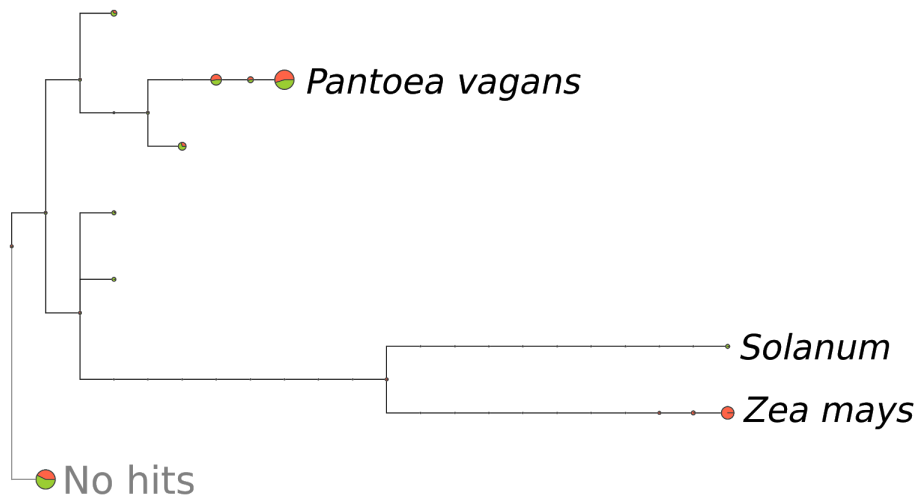

524 **Figure S3.** Taxonomic tree of reads from *Solanum tuberosum* and *Zea mays* assigned  
525 to different taxonomic levels. The size of the circle represents the amount of reads  
526 assigned to a particular part or the taxonomy. *S. tuberosum*- and *Z. mays*-derived reads  
527 are shown in green and orange, respectively.

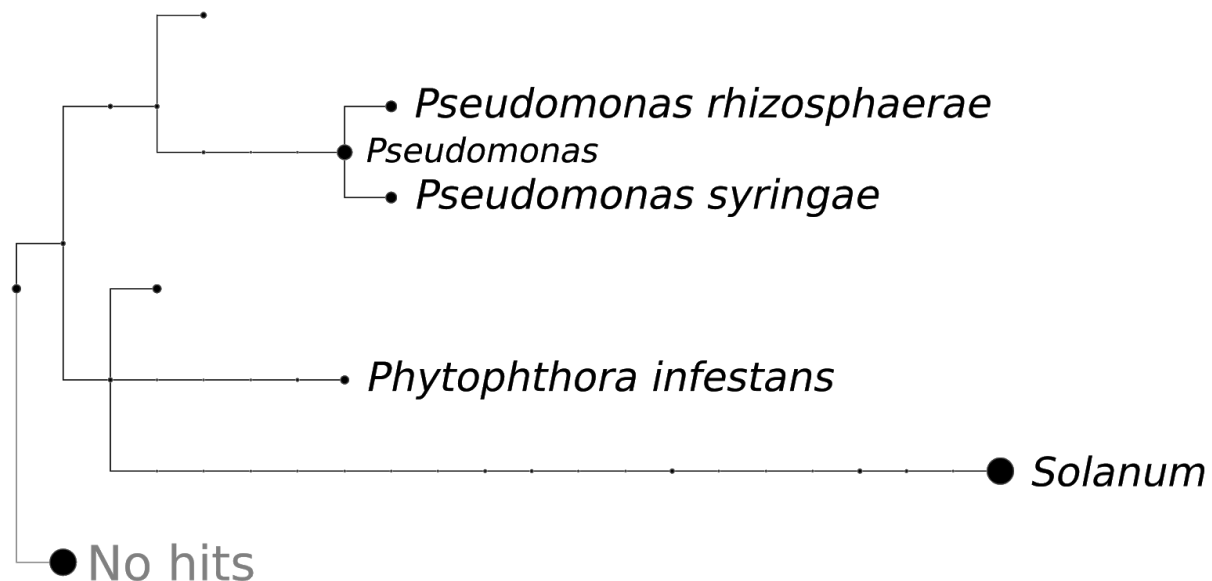

528 **Figure S4.** Taxonomic tree of reads from a *Solanum tuberosum* library assigned to  
529 different taxonomic levels. The size of the circle represents the amount of reads  
530 assigned to a particular part of the taxonomy. Reads assigned to some species  
531 *Phytophthora infestans*, *Pseudomonas syringae* and *Pseudomonas rhizosphere*, as well  
532 as the genera *Pseudomonas* and *Solanum* are named in the taxonomic tree.

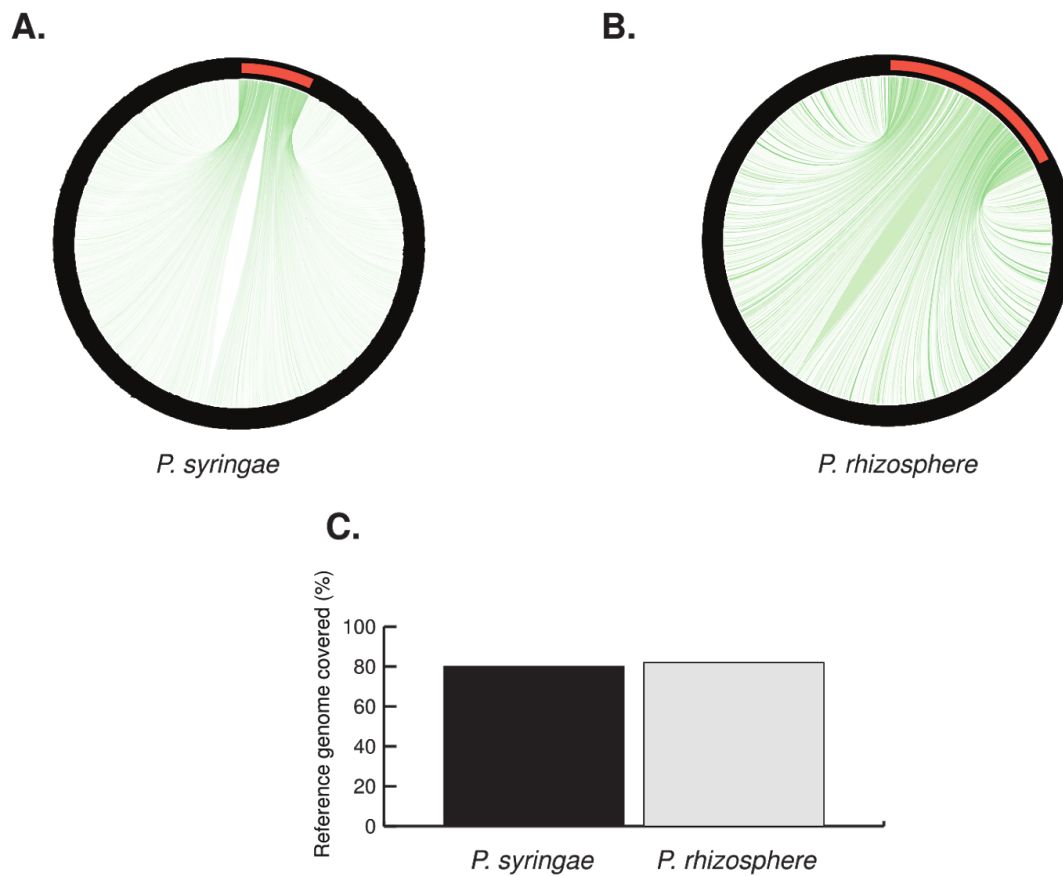

533 **Figure S5.** De novo assembly and genomic coverage of *Pseudomonas syringae* and  
534 *Pseudomonas rhizosphere* from a *Solanum tuberosum* sample. **A.** Alignments  
535 (represented as green lines) between all de novo assembly contigs (black) and *P.*  
536 *syringae* reference genome (red). **B.** Alignments (represented as green lines) between  
537 all de novo assembly contigs (black) and *P. rhizosphere* reference genome (red). **C.**  
538 Percentage of reference genome of *P. syringae* and *P. rhizosphere* covered by de novo  
539 assembled contigs from A. and B., respectively.

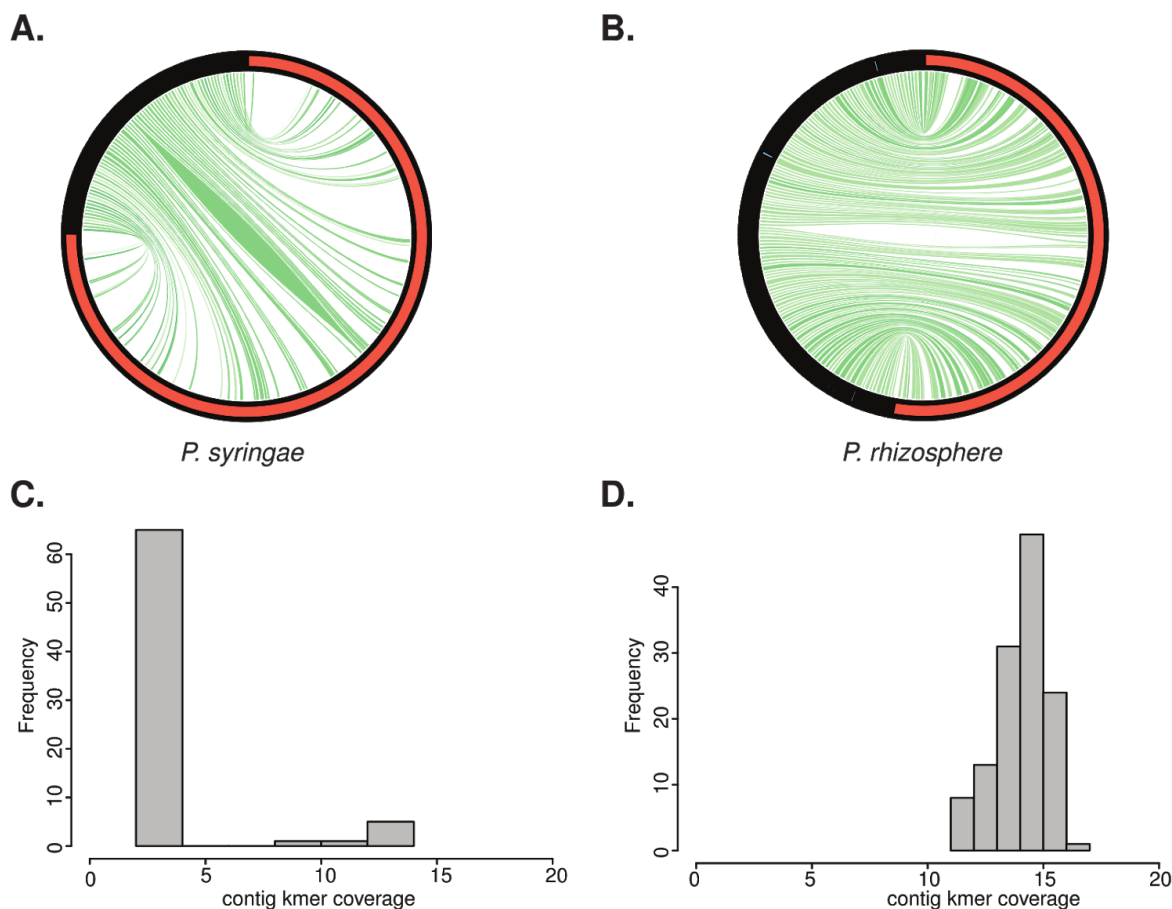

540 **Figure S6.** De novo assembly (uniquely mapped contigs) and contig k-mer coverage of  
541 *Pseudomonas syringae* and *Pseudomonas rhizosphere* from a *Solanum tuberosum*  
542 sample. **A.** Alignments (represented as green lines) between de novo assembly contigs  
543 (black) uniquely mapped to *P. syringae* reference genome (red). **B.** Alignments  
544 (represented as green lines) between de novo assembly contigs (black) uniquely  
545 mapped to *P. rhizosphere* reference genome (red). **C.** Histogram of contig k-mer  
546 coverage from de novo assembled contigs uniquely mapping to *P. syringae*. **D.**  
547 Histogram of contig k-mer coverage from de novo assembled contigs uniquely mapping  
548 to *P. rhizosphere*.
